# Supplementary material
Source: PubMed Central journal article supplement (PMC10328181)

**Extended Data Figure 2D:**

Samples were run on the same gel.

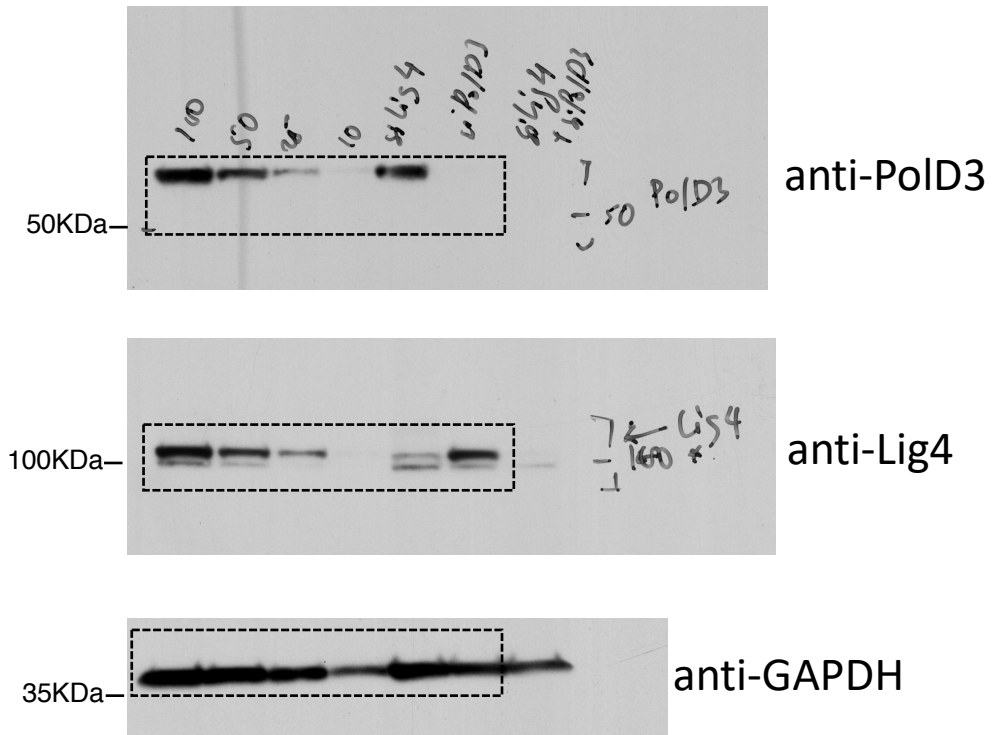

**Extended Data Figure 3D:**

Samples were run on the same gel.

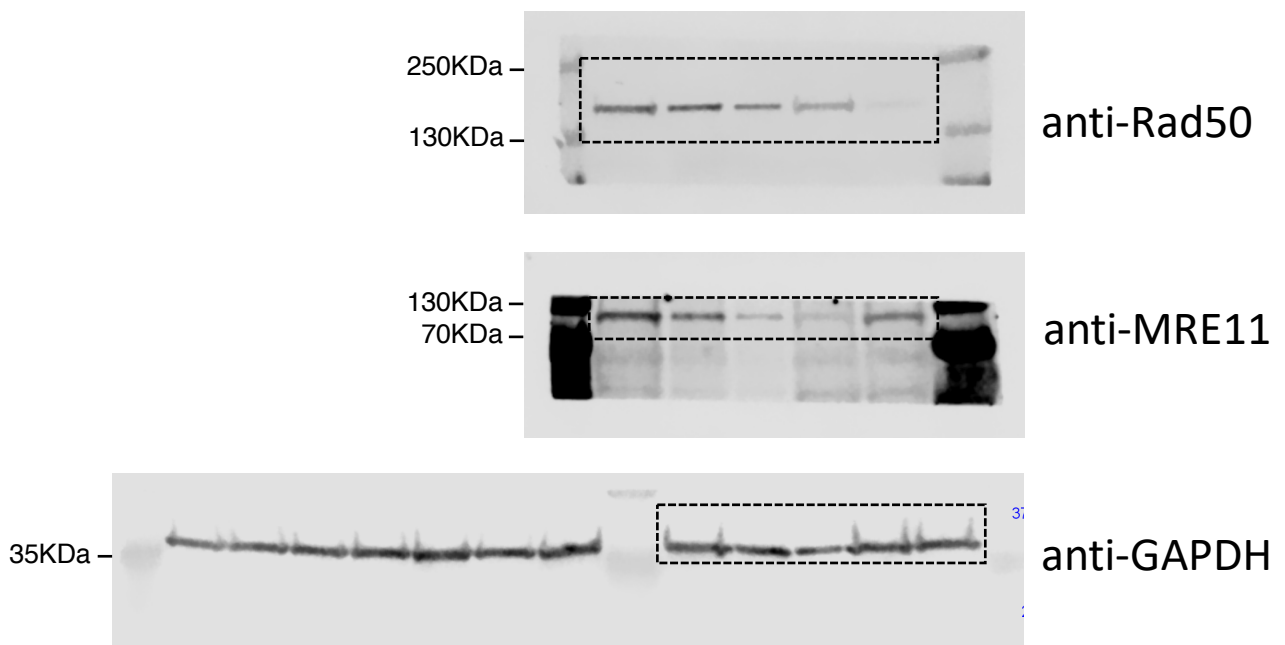

**Extended Data Figure 7A:**

Samples for MDC1, CIP2A, GAPDH (loading control) (top 3 blots) were run together on same gel. Samples for TOPBP1, GAPDH (loading control) (bottom 2 blots) were run together on different part of the same gel. Same set of samples were run in both bottom and top sets.

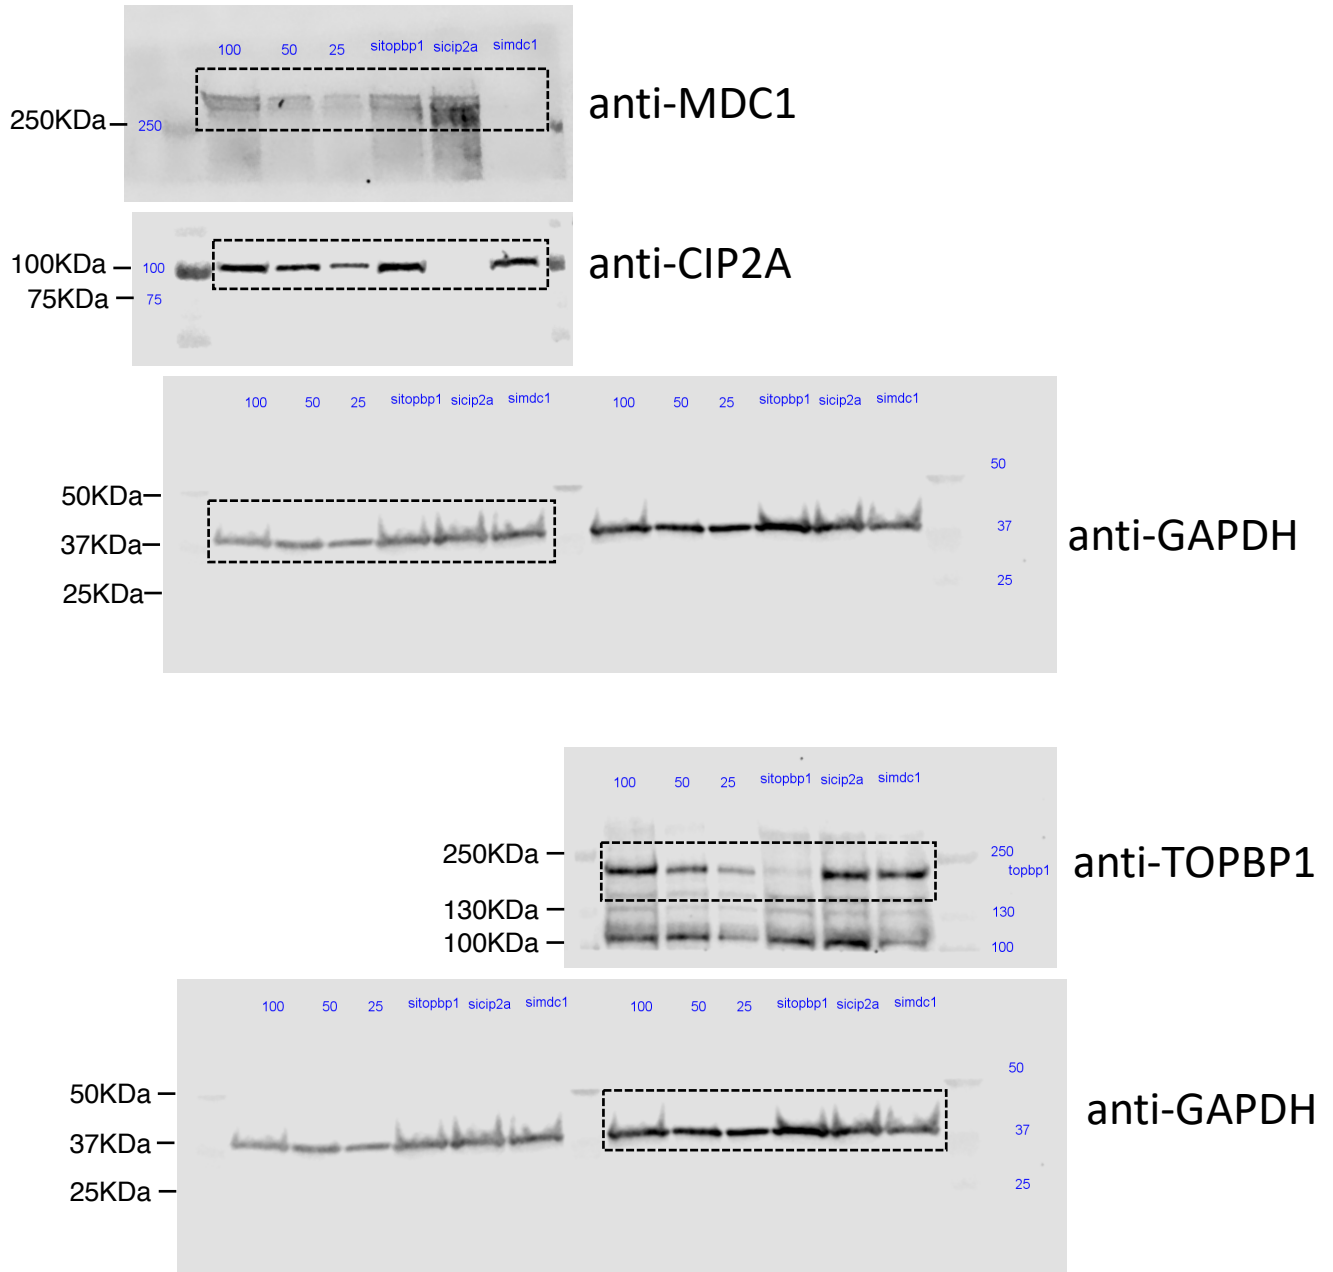

**Extended Data Figure 8C:**

Samples were run on the same gel.

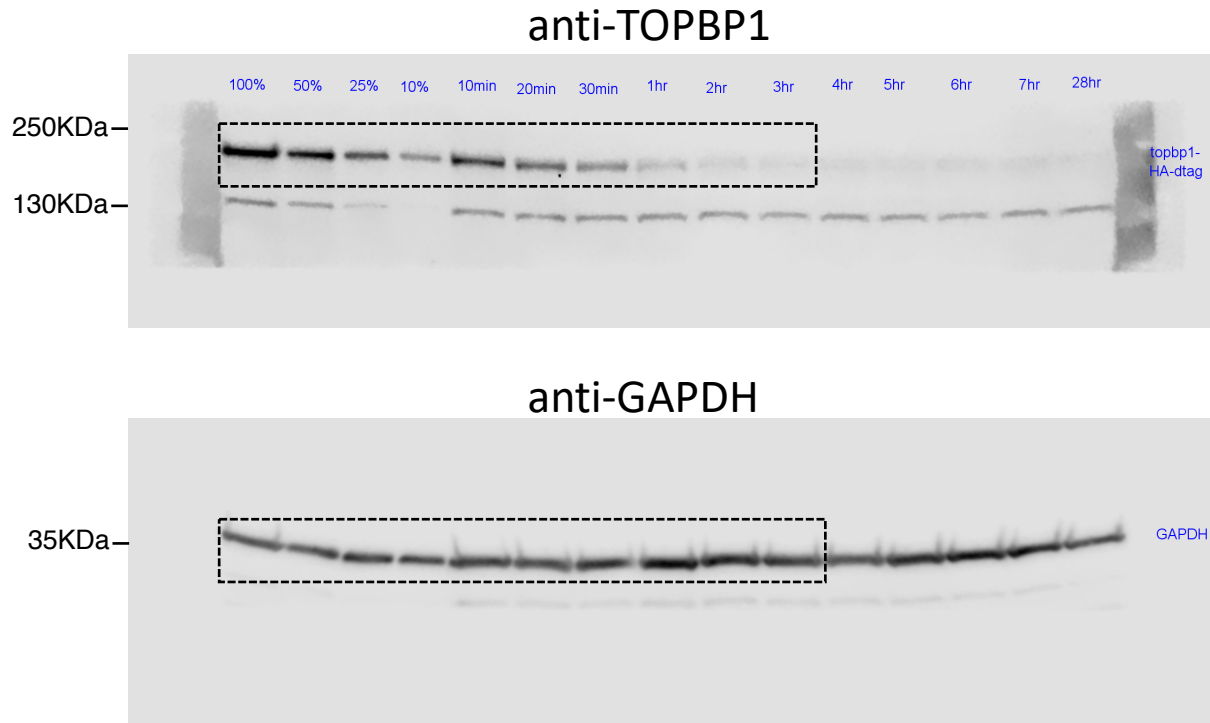

**Extended Data Figure 8E:**

Samples were run on the same gel.

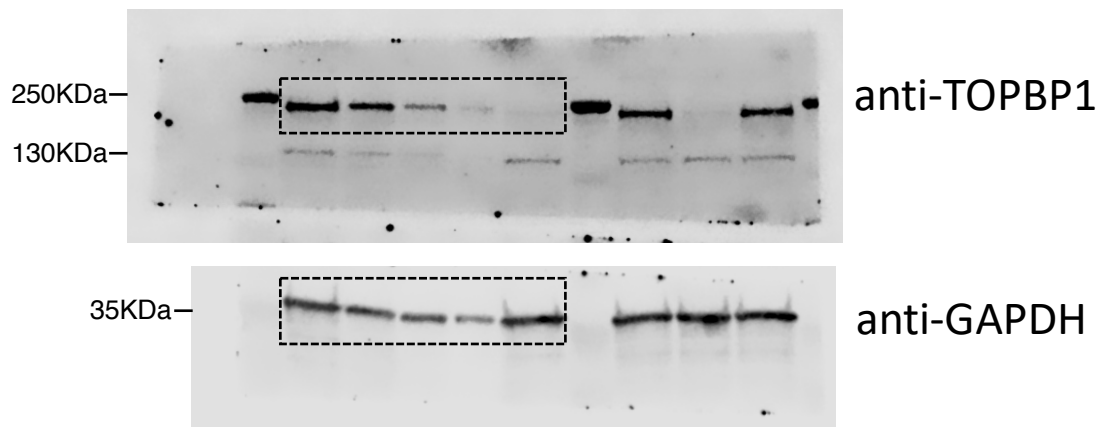

**Extended Data Figure 8J:**

Samples were run on the same gel.

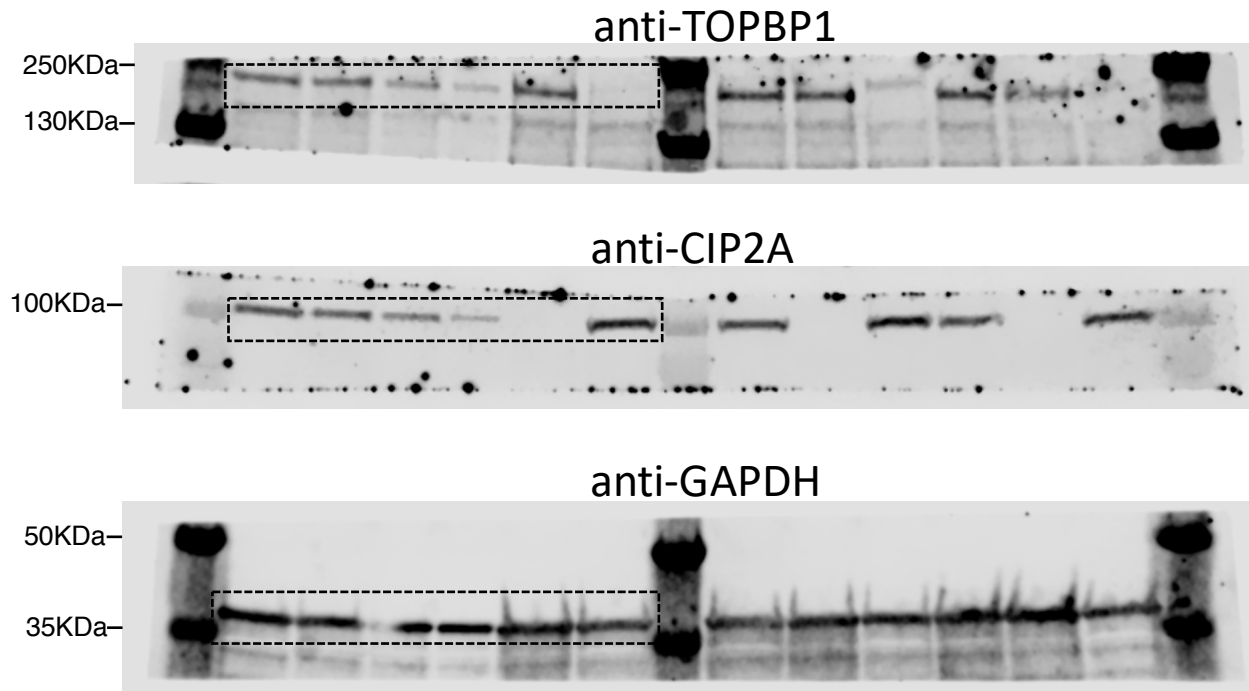

**Extended Data Figure 10A:**

Samples were run on the same gel.

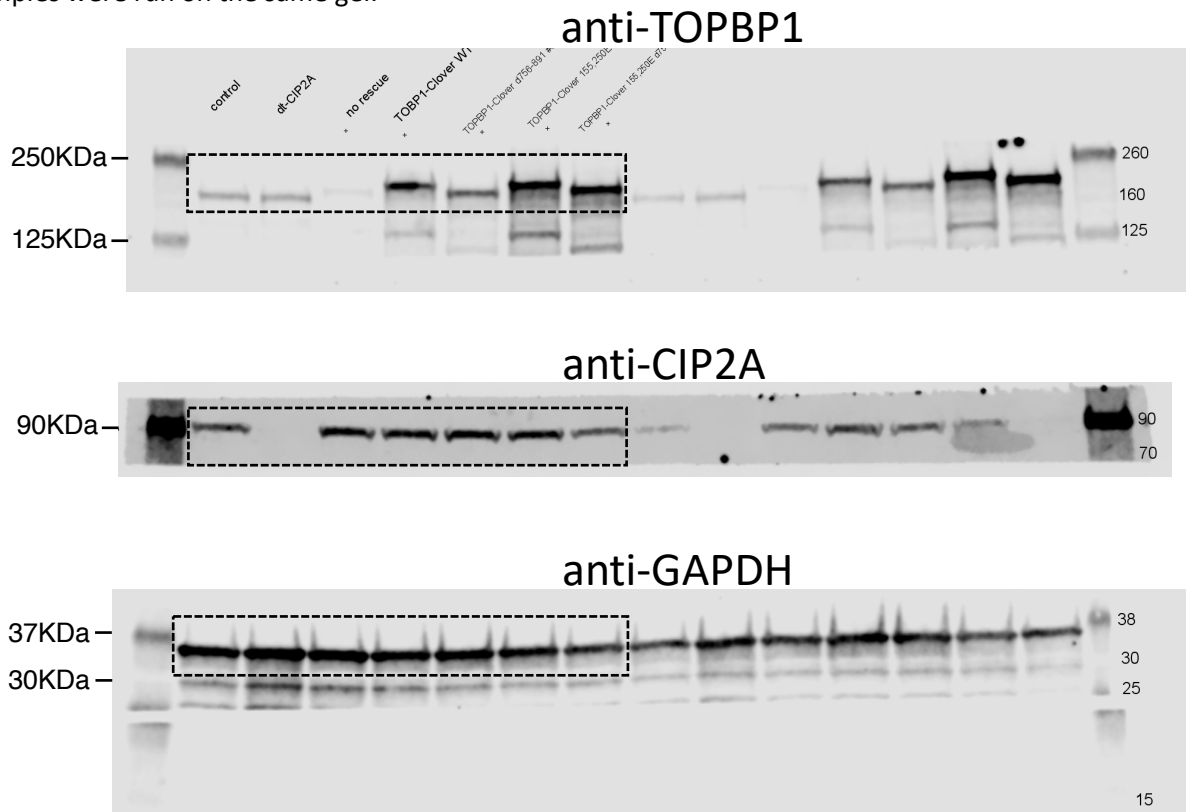

Supplement: NIHMS1904651-supplement-Supplementary_Figure_1.pdf [file NIHMS1904651-supplement-Supplementary_Figure_1.pdf]
